# Supplementary material for: Genomics of Atlantic Forest Mycobacteriaceae strains unravels a mobilome diversity with a novel integrative conjugative element and plasmids harbouring T7SS
Source: PubMed Central journal article supplement (PMC7478629; doi:10.1099/mgen.0.000382), 2020-06-04
Supplement: mgen-6-382-s001.pdf [file mgen-6-382-s001.pdf]

## Supplementary Figures

Figure S1

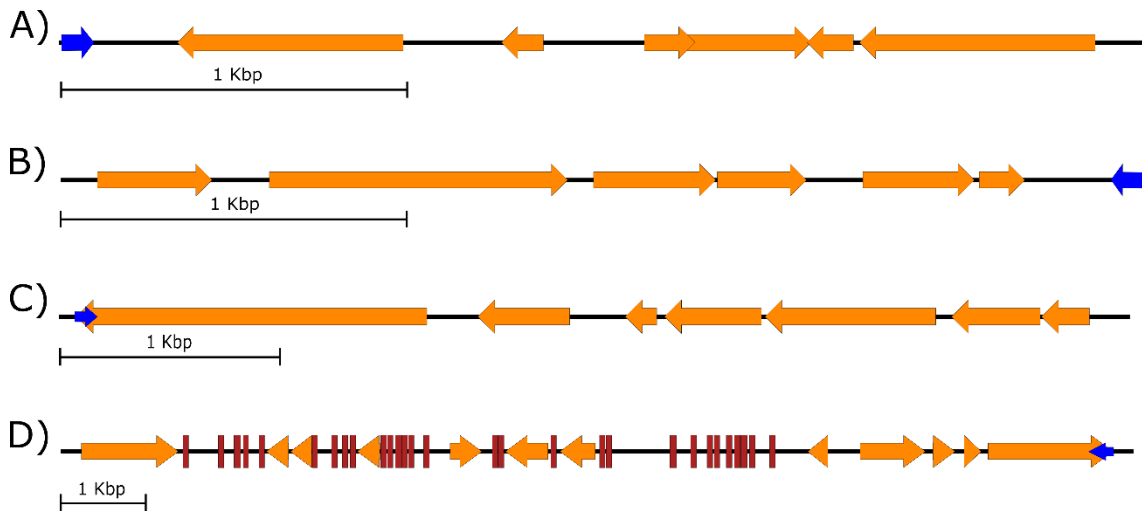

Fig. S1. Inverted repeats of pCBMA213\_1. Inverted terminal repeats of pCBMA213\_1 on the left side (A) and on right side (B). Inverted repeats flanking the left (C) and right (D) sides of a ~89 kb region (169,352 - 258,453 bp). The blue and orange arrows represent the inverted repeats and protein-coding genes, respectively, while the red blocks represent tRNA genes. The scale is shown below each figure.

Figure S2

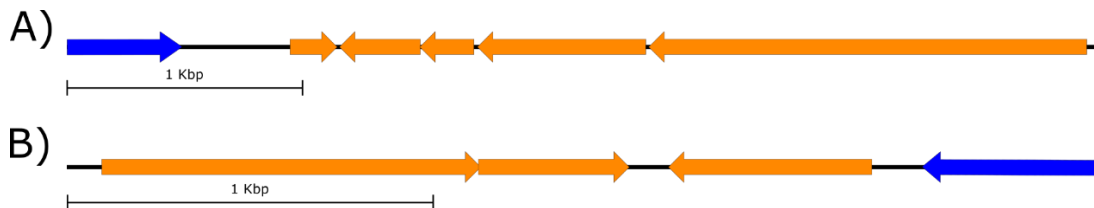

Fig. S2. Inverted terminal repeats of pCBMA213\_3 on the left side (A) and on right side (B). The blue and orange arrows represent the inverted terminal repeats and protein-coding genes, respectively. The scale is shown below each figure.

**Figure S3**

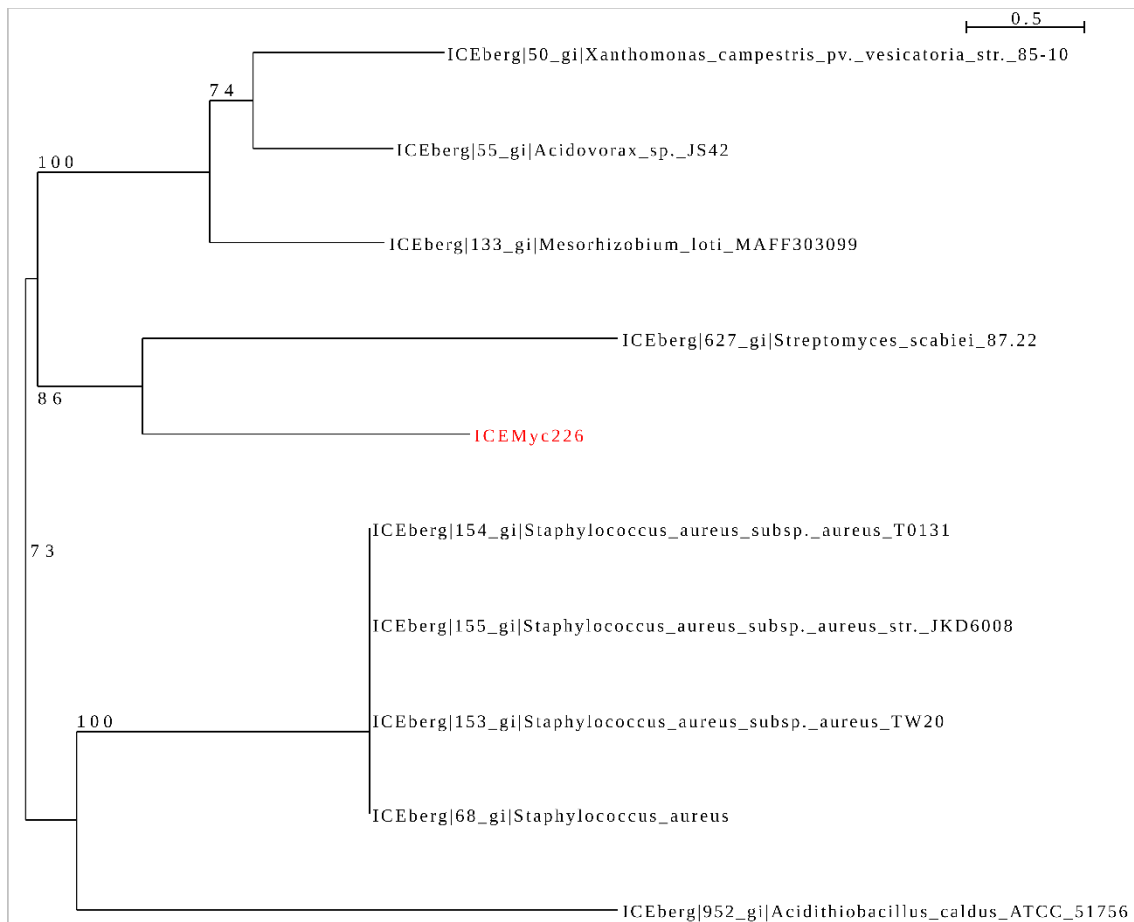

**Fig. S3.** Maximum likelihood tree (100 bootstrap replicates) of ICEMyc226 DDE-integrase/transposase/recombinase with the most similar integrases and transposases from the ICEberg database.
